# Supplementary material for: H-Bonding leading to latent initiators for olefin metathesis polymerization
Source: Royal Society of Chemistry journal article supplement (doi:10.1039/d2fd00163b), 2023-01-01
Supplement: d2fd00163b1.pdf [file d2fd00163b1.pdf]

### Steric maps:

#### 1A:

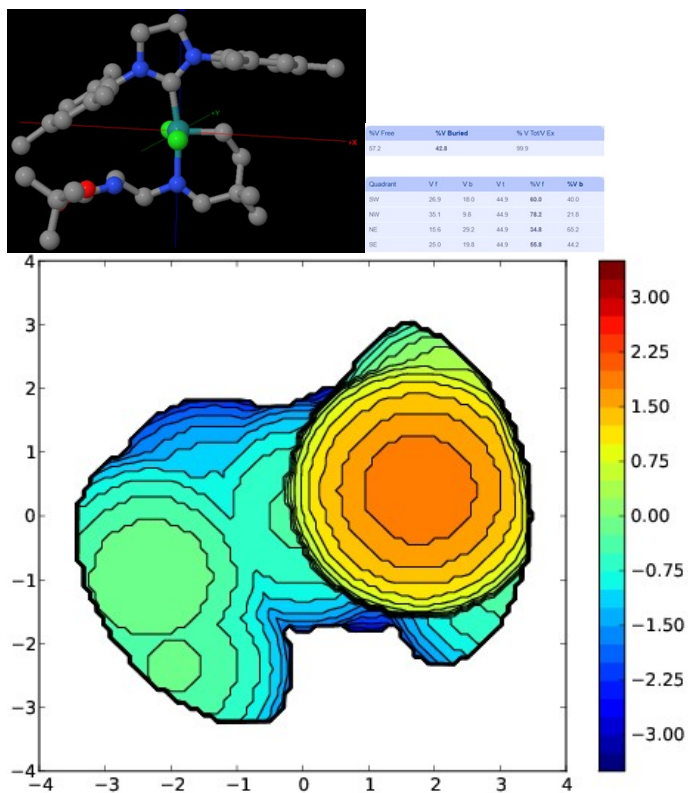

#### 2A:

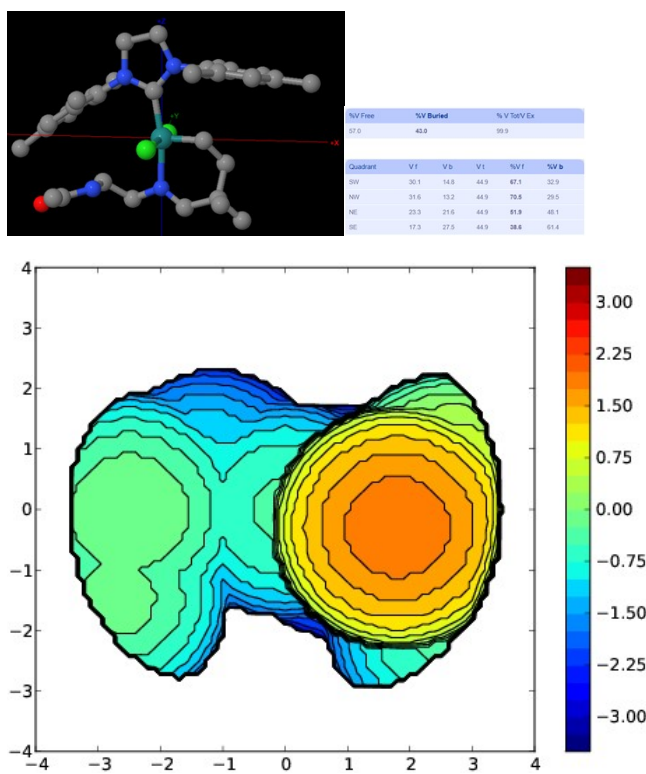

### 3A:

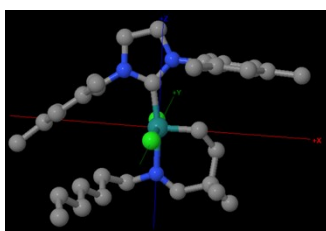

| %V Free  | %V Buried | %V TotV Ex |      |      |      |
|----------|-----------|------------|------|------|------|
| 35.1     | 41.5      | 93.5       |      |      |      |
| Quadrant | V1        | V2         | V3   | %V1  | %V2  |
| SW       | 29.3      | 15.6       | 44.9 | 68.2 | 24.7 |
| SW       | 24.5      | 10.2       | 44.5 | 71.2 | 23.5 |
| NE       | 15.8      | 25.1       | 44.9 | 44.1 | 55.9 |
| NE       | 20.5      | 24.3       | 44.9 | 45.8 | 54.2 |

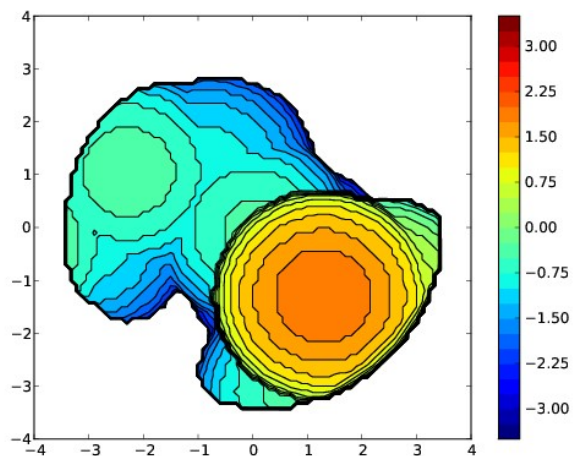

### 4A:

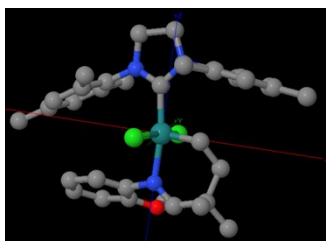

| %V Free  | %V Buried | %V TotV Ex |      |      |      |
|----------|-----------|------------|------|------|------|
| 34.5     | 41.5      | 93.5       |      |      |      |
| Quadrant | V1        | V2         | V3   | %V1  | %V2  |
| SW       | 35.5      | 11.3       | 44.9 | 74.7 | 25.3 |
| SW       | 31.5      | 13.4       | 44.9 | 70.2 | 29.8 |
| SE       | 25.5      | 19.3       | 44.9 | 56.9 | 43.1 |
| SE       | 14.5      | 30.3       | 44.9 | 32.4 | 67.6 |

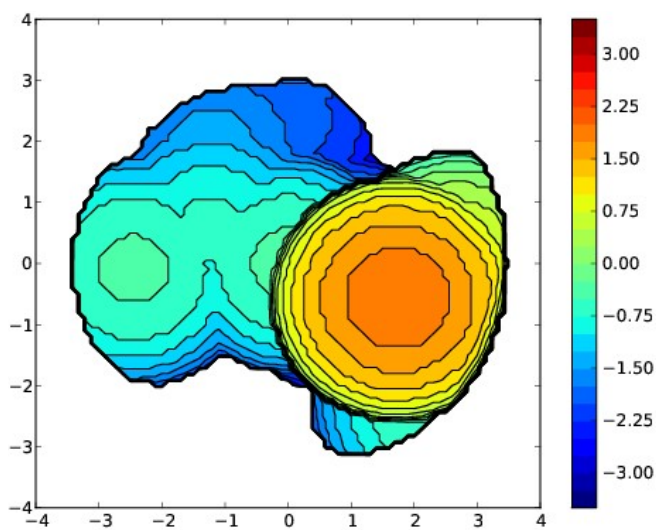

### 5A:

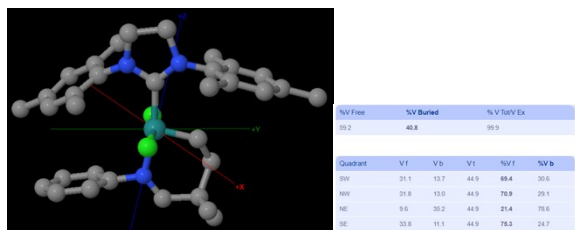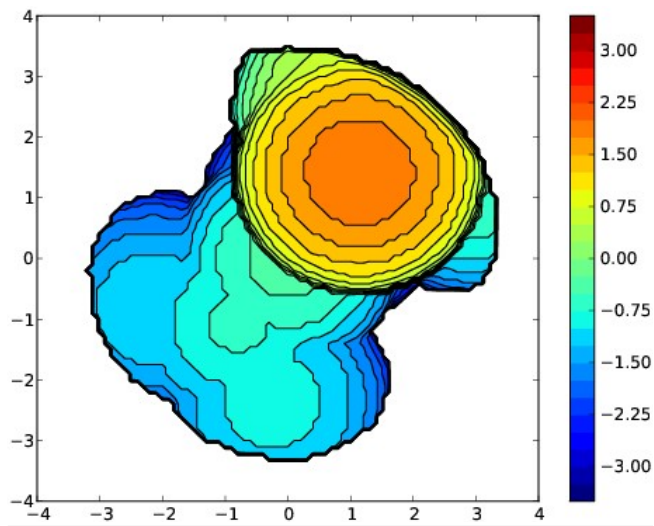

**Figure S1.** Orientation, % $V_{Bur}$  values and steric maps of precatalyst **A** for systems 1-5.

### **NBO Analysis:**

Occupancies:

|                 |                             |
|-----------------|-----------------------------|
| Total Lewis     | 369.25723 ( 98.207% of 376) |
| Total non-Lewis | 6.74277 ( 1.793% of 376)    |

| CR | BD  | nC | LP |
|----|-----|----|----|
| 54 | 103 | 0  | 17 |

### SECOND ORDER PERTURBATION THEORY ANALYSIS

|               |                      |          |
|---------------|----------------------|----------|
| 59. LP (3)Cl2 | 197. BD* (1) N11-H81 | E=-11.60 |
|---------------|----------------------|----------|

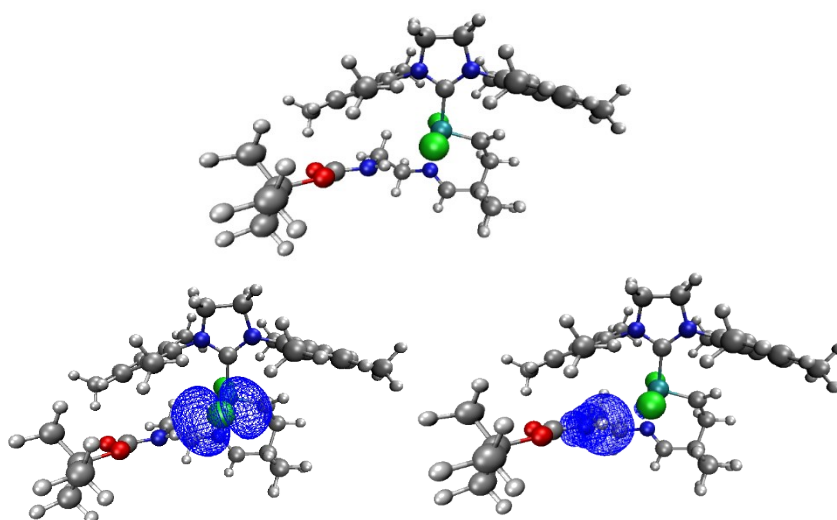

*Figure S2. Frontal view: (left) 59. LP (3)Cl2 (right)197. BD\* (1) N11-H81*

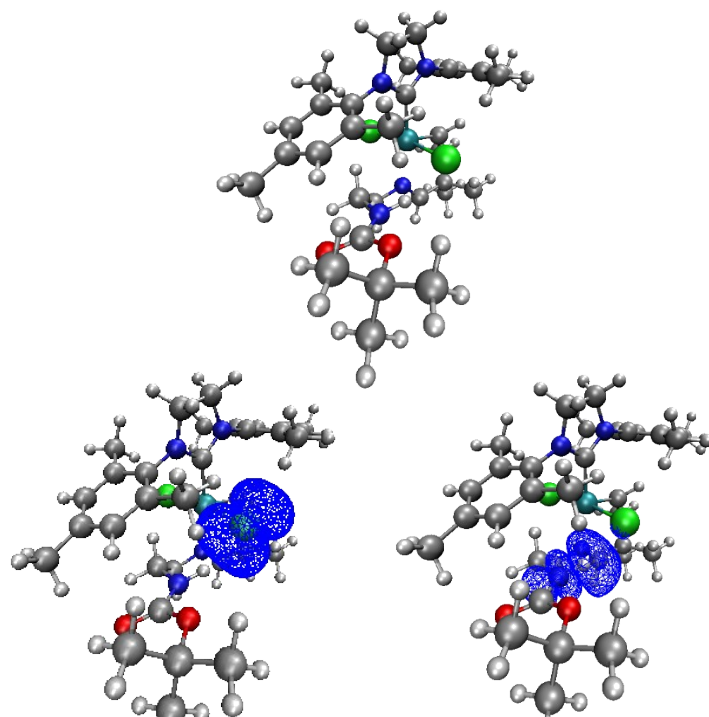

*Figure S3. Lateral view: (left) 59. LP (3)Cl2 (right)197. BD\* (1) N11-H81*

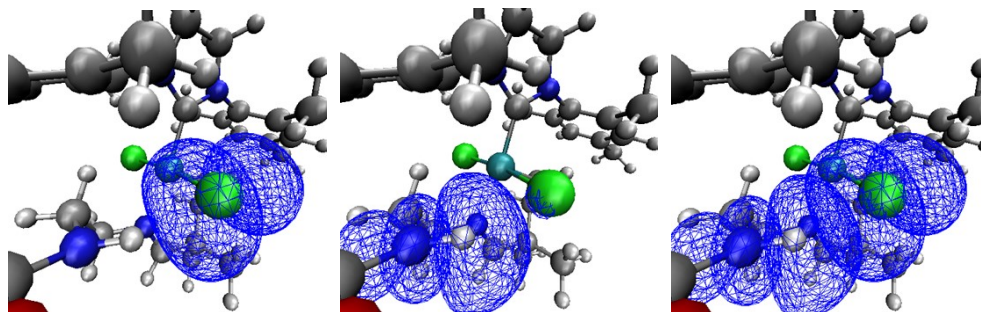

*Figure S4. Frontal close-up: (a) 59. LP (3)Cl2 (b)197. BD\* (1) N11-H81 (c) Overlap of the two orbitals.*

**NCI PLOTS:**

1A

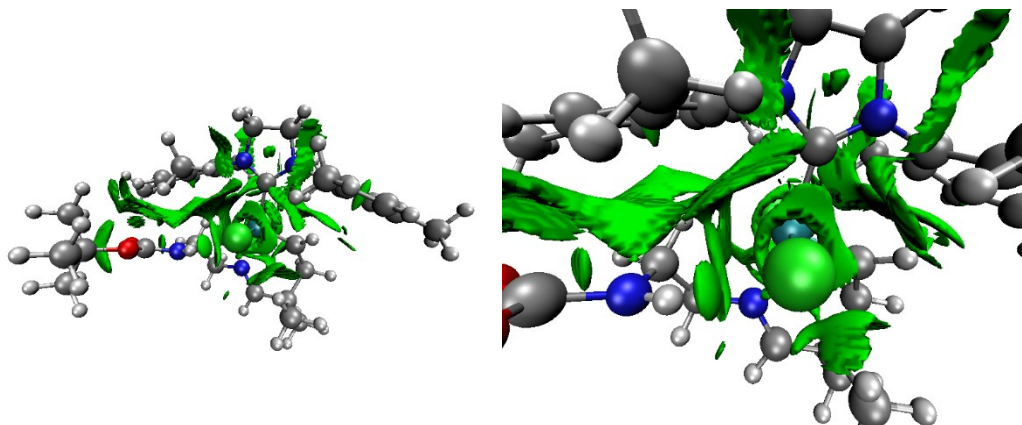

2A

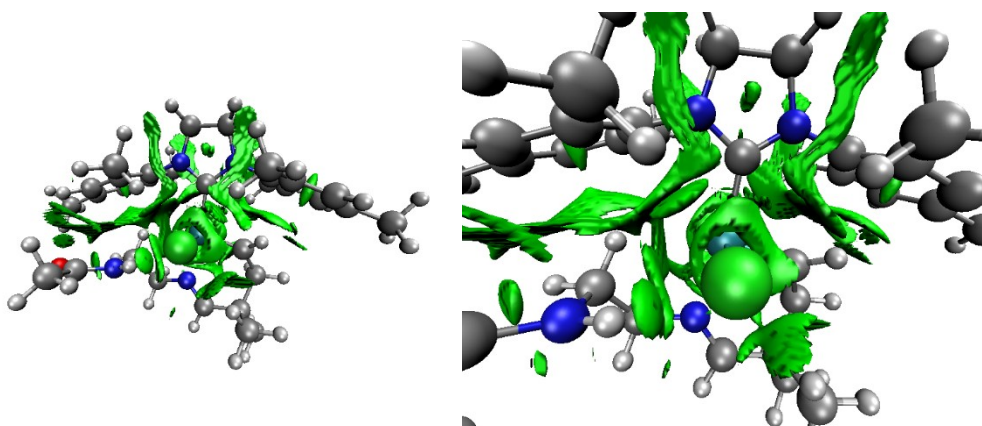

3A

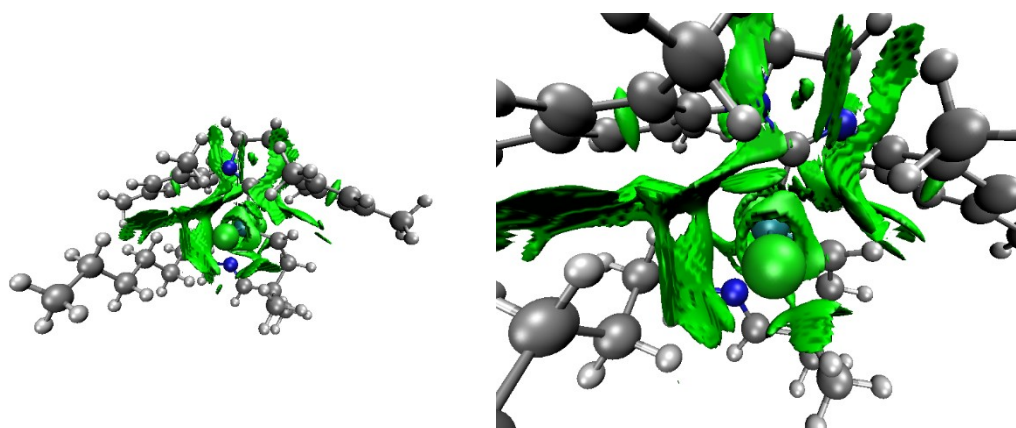

4A

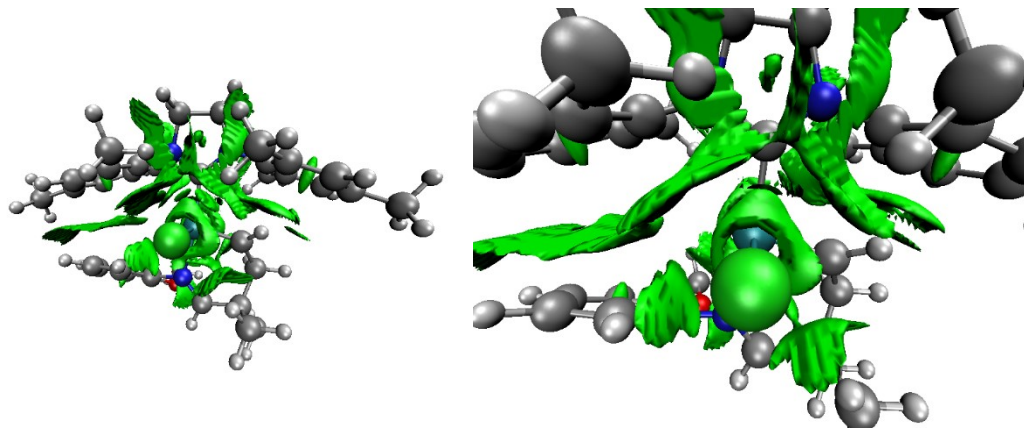

5A

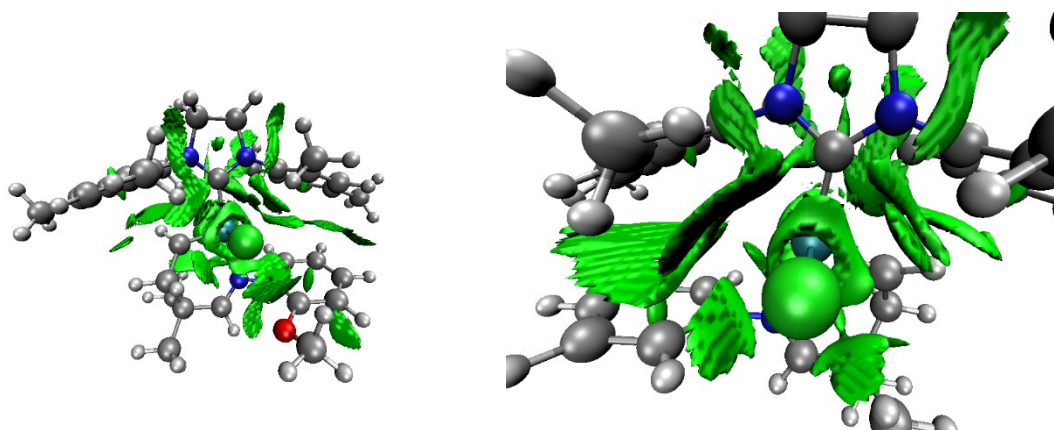

**Figure S5.** NCI plots of the initial intermediate **A** for systems **1-5** (the whole picture is truncated on the right for the sake of clarity of the metal centre).

1A

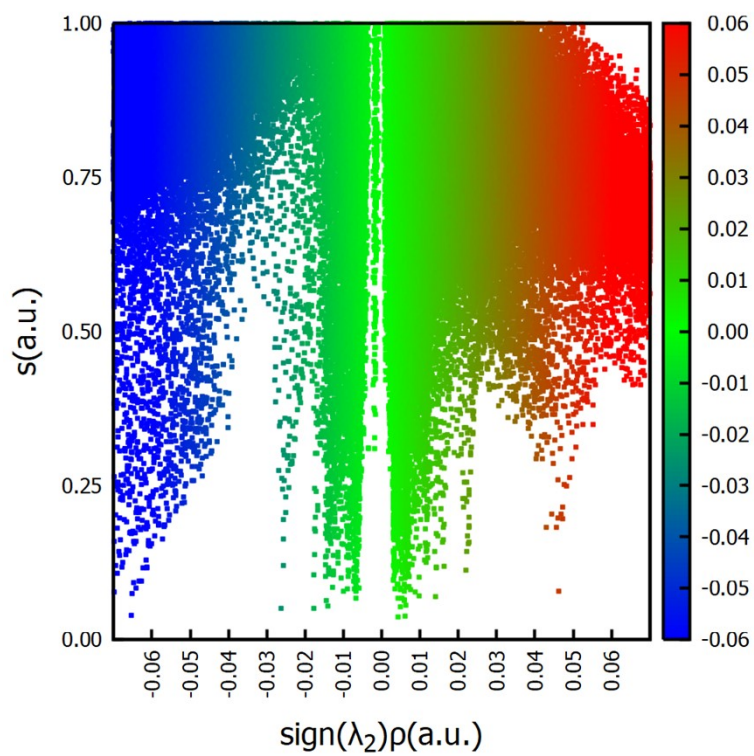

2A

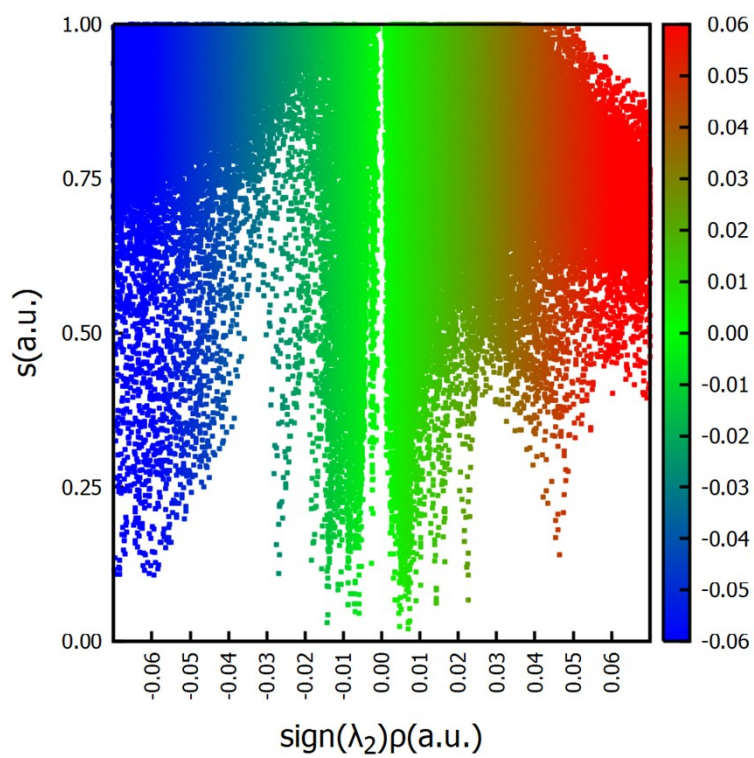



3A

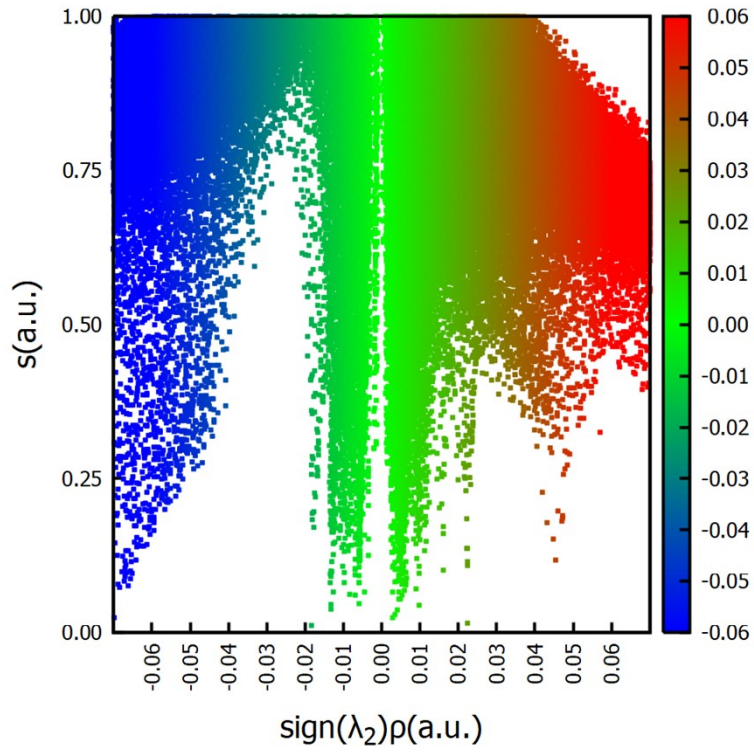

4A

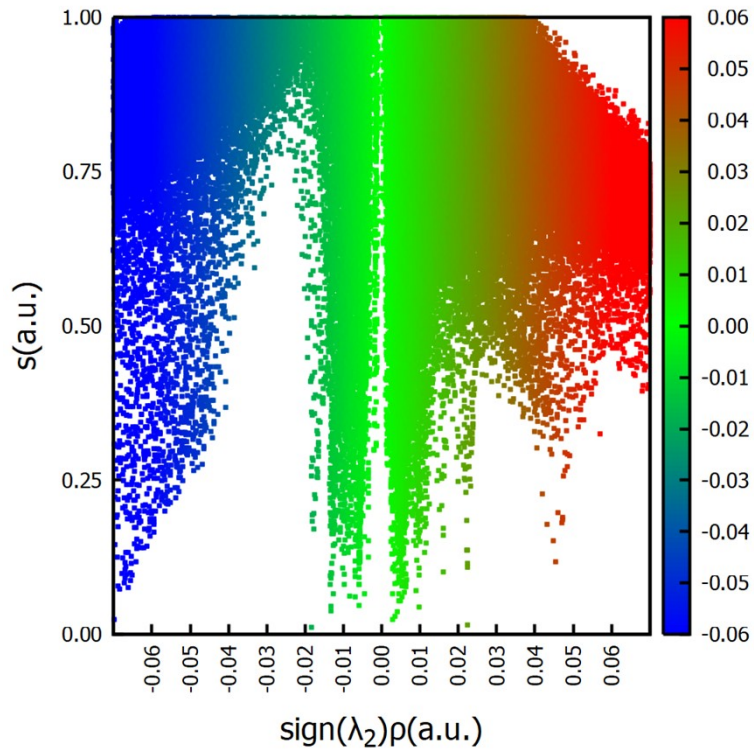

5A

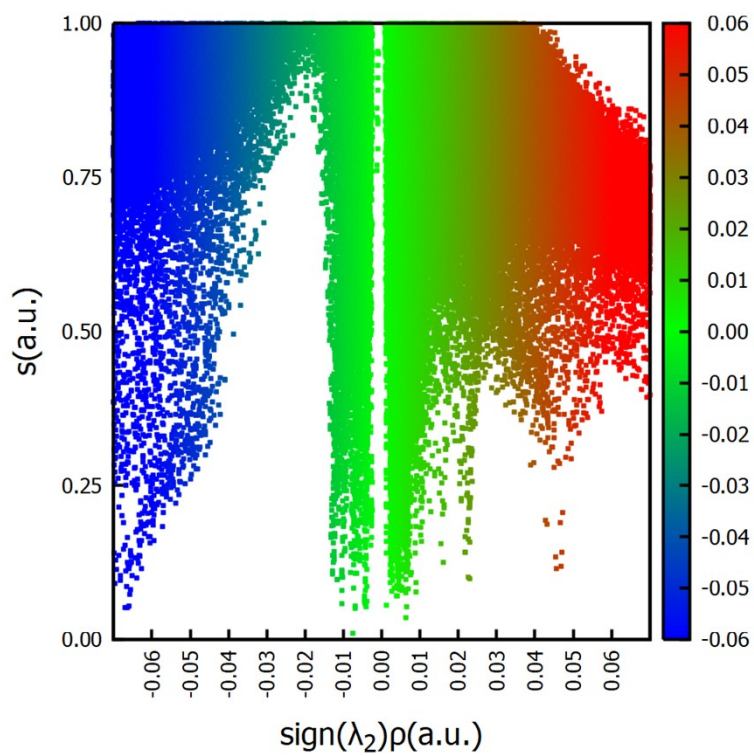

**Figure S6.** 2D-NCI plots of reduced density gradient ( $S$ ) vs  $\text{sign}(\lambda_2)\rho$ , in a.u. for the initial intermediate **A** for systems 1-5.
